# Supplementary material
Source: publisher figshare collection journal article supplement (https://acs.figshare.com/ndownloader/files/4766230)
Supplement: Supplementary file 1 [file 4766230]

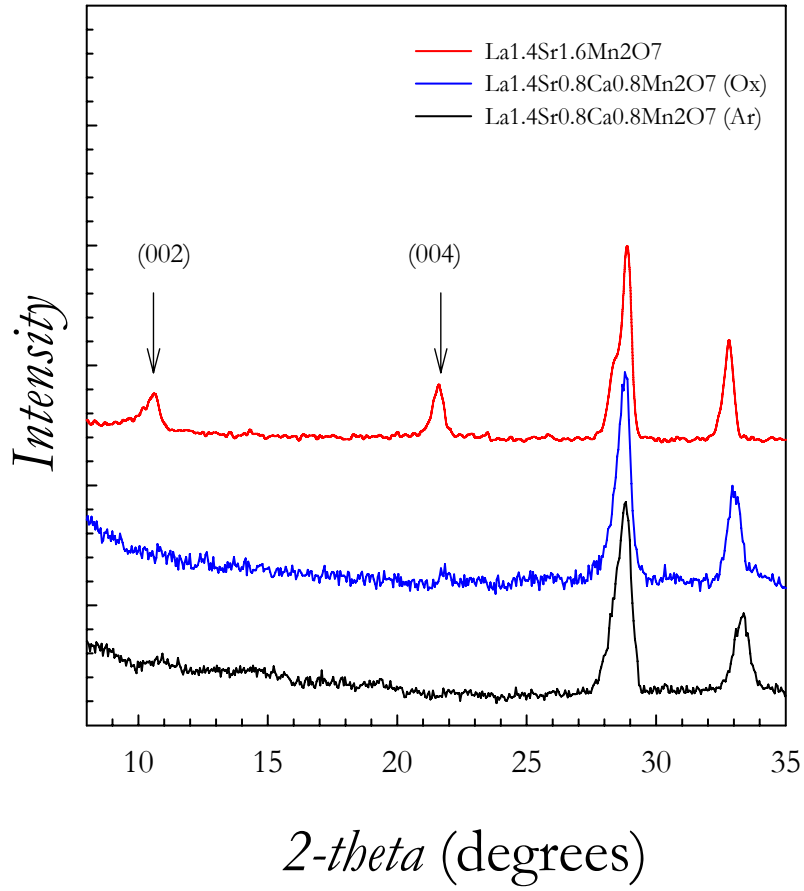

**Figure 1 – Supplementary Information**

ND patterns for the  $\text{La}_{1.4}\text{Sr}_{1.6}\text{Mn}_2\text{O}_7$  (collected at 57 K on D1A – ILL – at 1.91 Å) (red line) and for the two samples considered in the paper (collected as described in the experimental): blue line for the oxygen annealed sample and black line for the argon annealed sample. Arrows in the Figure mark the two indexed ferromagnetic peaks relative to the long-range magnetic order of the  $\text{La}_{1.4}\text{Sr}_{1.6}\text{Mn}_2\text{O}_7$  sample.
